# Supplementary material
Source: publisher figshare collection journal article supplement (https://gsajournals.figshare.com/articles/dataset/_/7471409)
Supplement: Supplementary file 1 [file 2]

**A****wild type**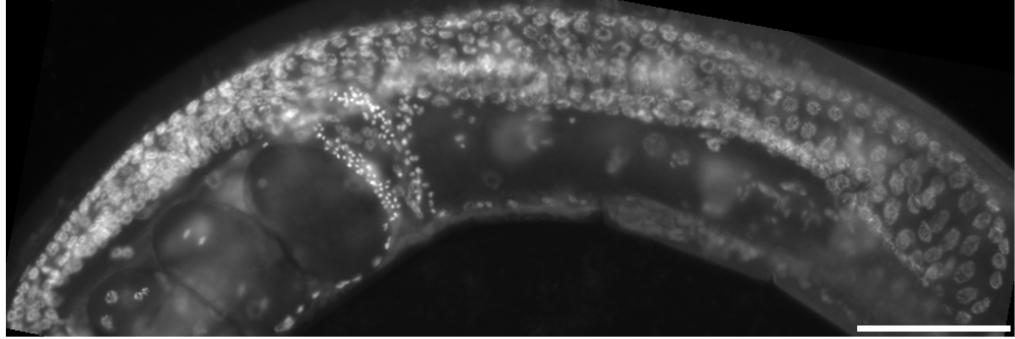***akir-1*  
(*gk528*)**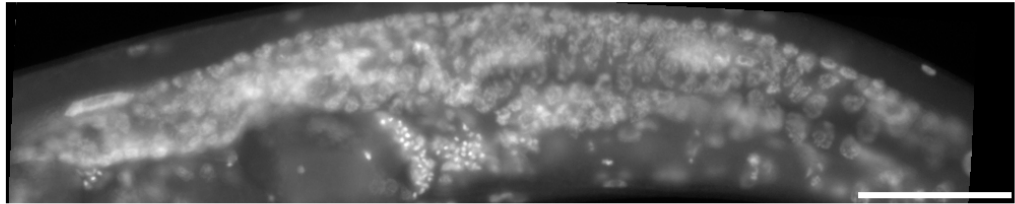***ima-2*  
(*ok256*)**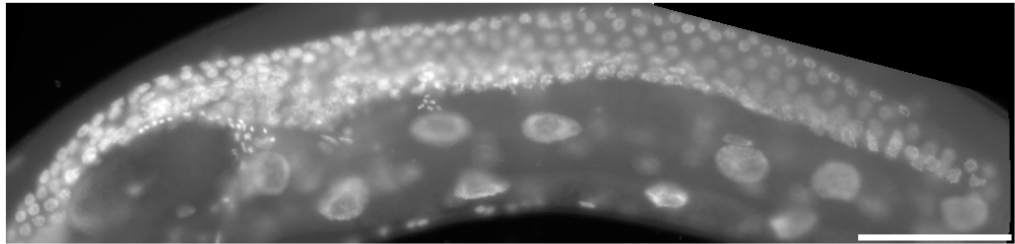***akir-1*;  
*ima-2***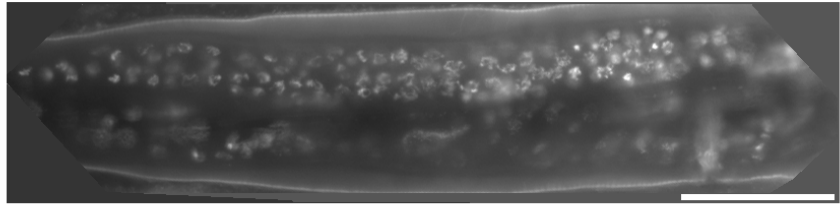

**Figure S1: Loss of AKIR-1 and IMA-2 leads to reduction in gonad size**

A) Whole worm fixation and DAPI staining in wild type, *akir-1(gk528)*, *ima-2(ok256)*, and *akir-1(gk528); ima-2(ok256)*. Images are projections of about half a worm containing one gonadal arm. scale bars are 50 $\mu$ m.

**A**Zone 1  
(PMT)Zone 5  
(MP)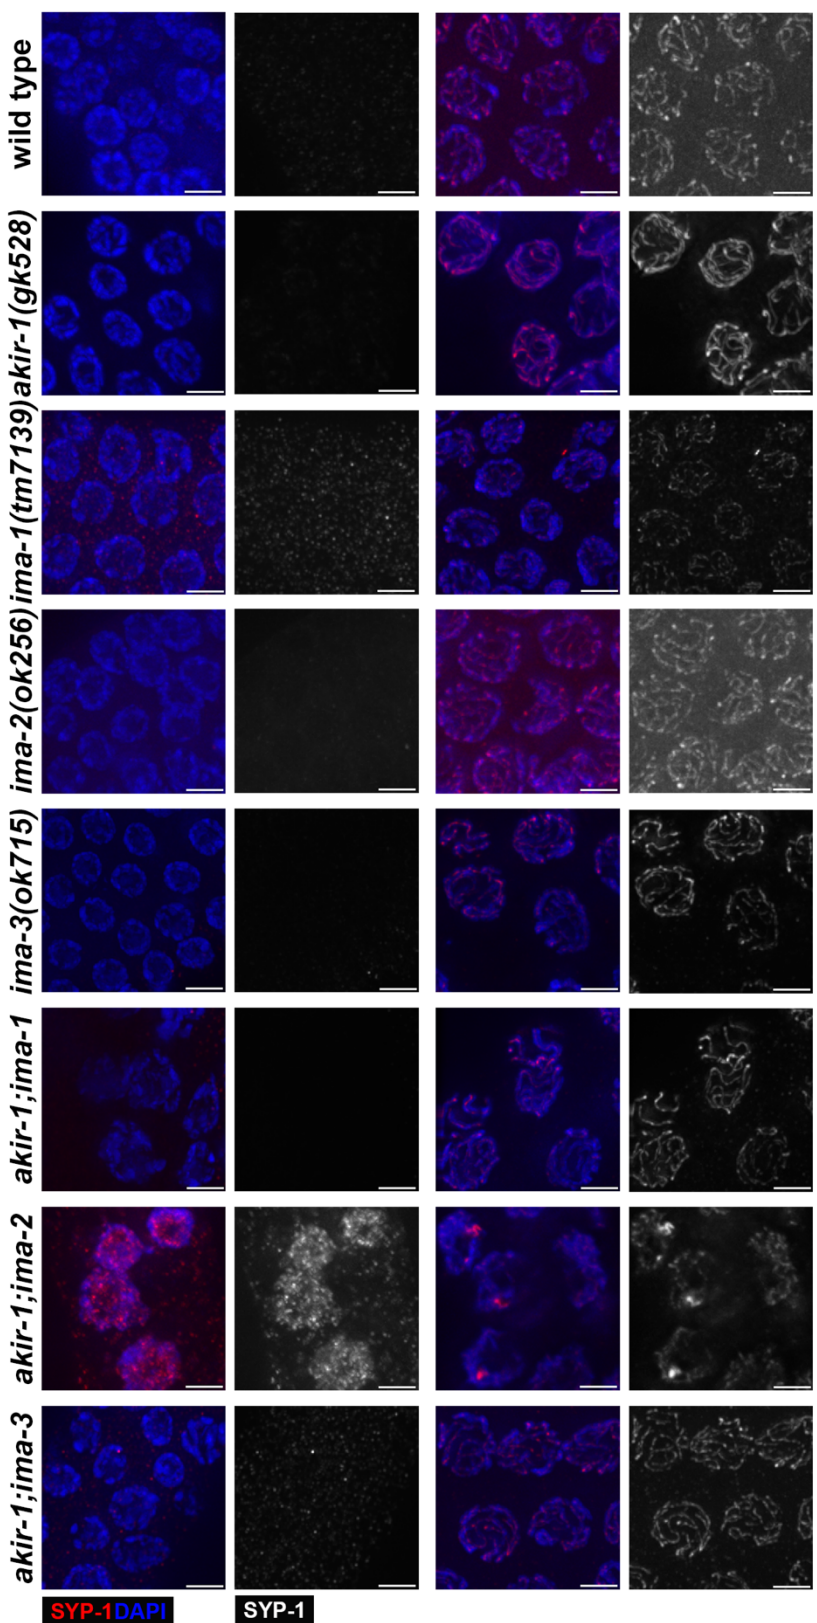

**Figure S2: Loss of AKIR-1 and either IMA-1 or IMA-3 does not affect import or loading of SYP proteins**

A) Immunolocalization of SYP-1 in wild type, *akir-1(gk528)*, *ima-1(tm7139)*, *ima-2(ok256)*, *ima-3(ok715)*, and *akir-1;importin* double mutants for germline nuclei in mitotic proliferation and middle prophase. The only mutant exhibiting aberrant loading of SYP proteins are *akir-1;ima-2*. Blue is DAPI stained chromatin, red is SYP-1, and black and white is SYP-1 without chromatin in the background, scale bars are 3 $\mu$ m.

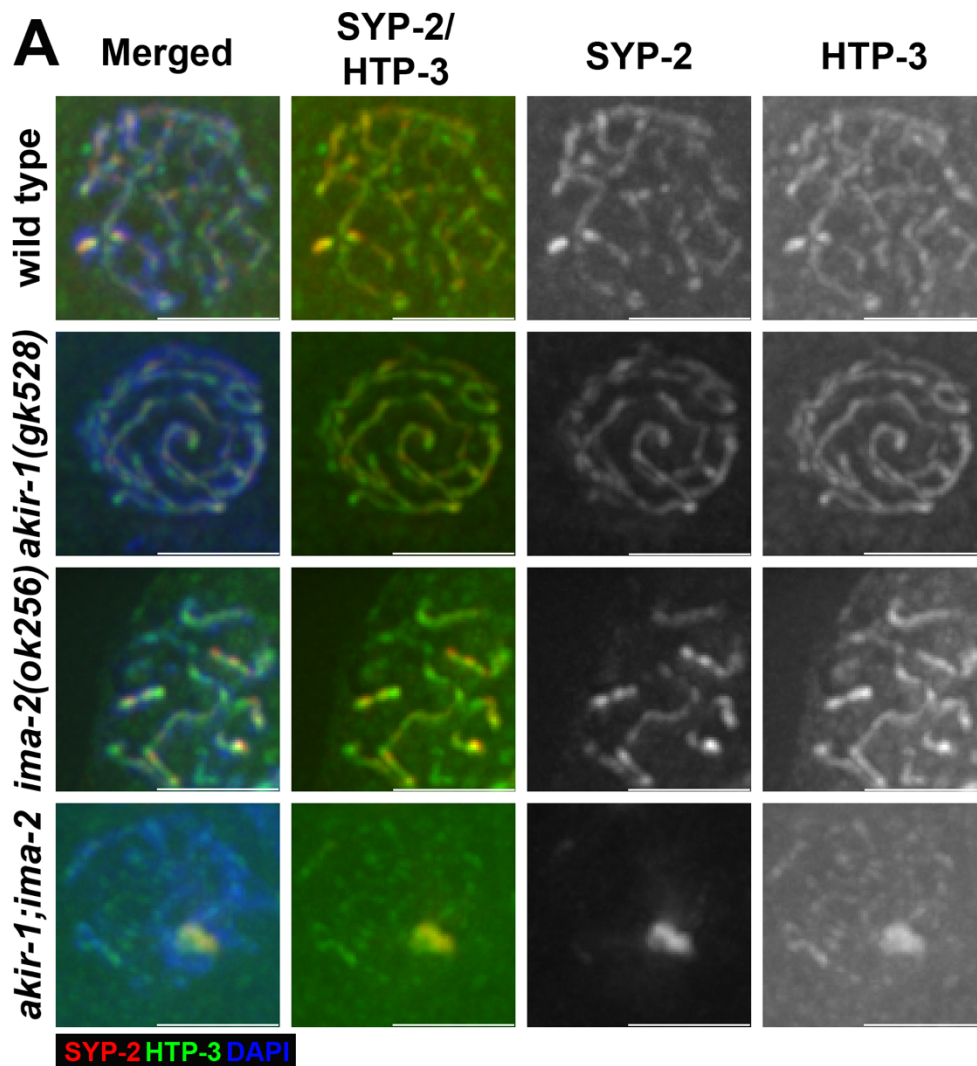

**Figure S3: Co-localization of central region and axial element proteins**

A) Immunolocalization of the colocalization of the SC central region protein SYP-2 and the axial element protein HTP-3. Blue is DAPI stained chromatin, red is SYP-2, and green is HTP-3. The MERGE panel contain all three channels, while SYP-2/HTP-3 does not contain DAPI. Black and white panels contain the localization pattern only for the antibody that is indicated at the top of the panel. Scale bars are  $3\mu\text{m}$ .



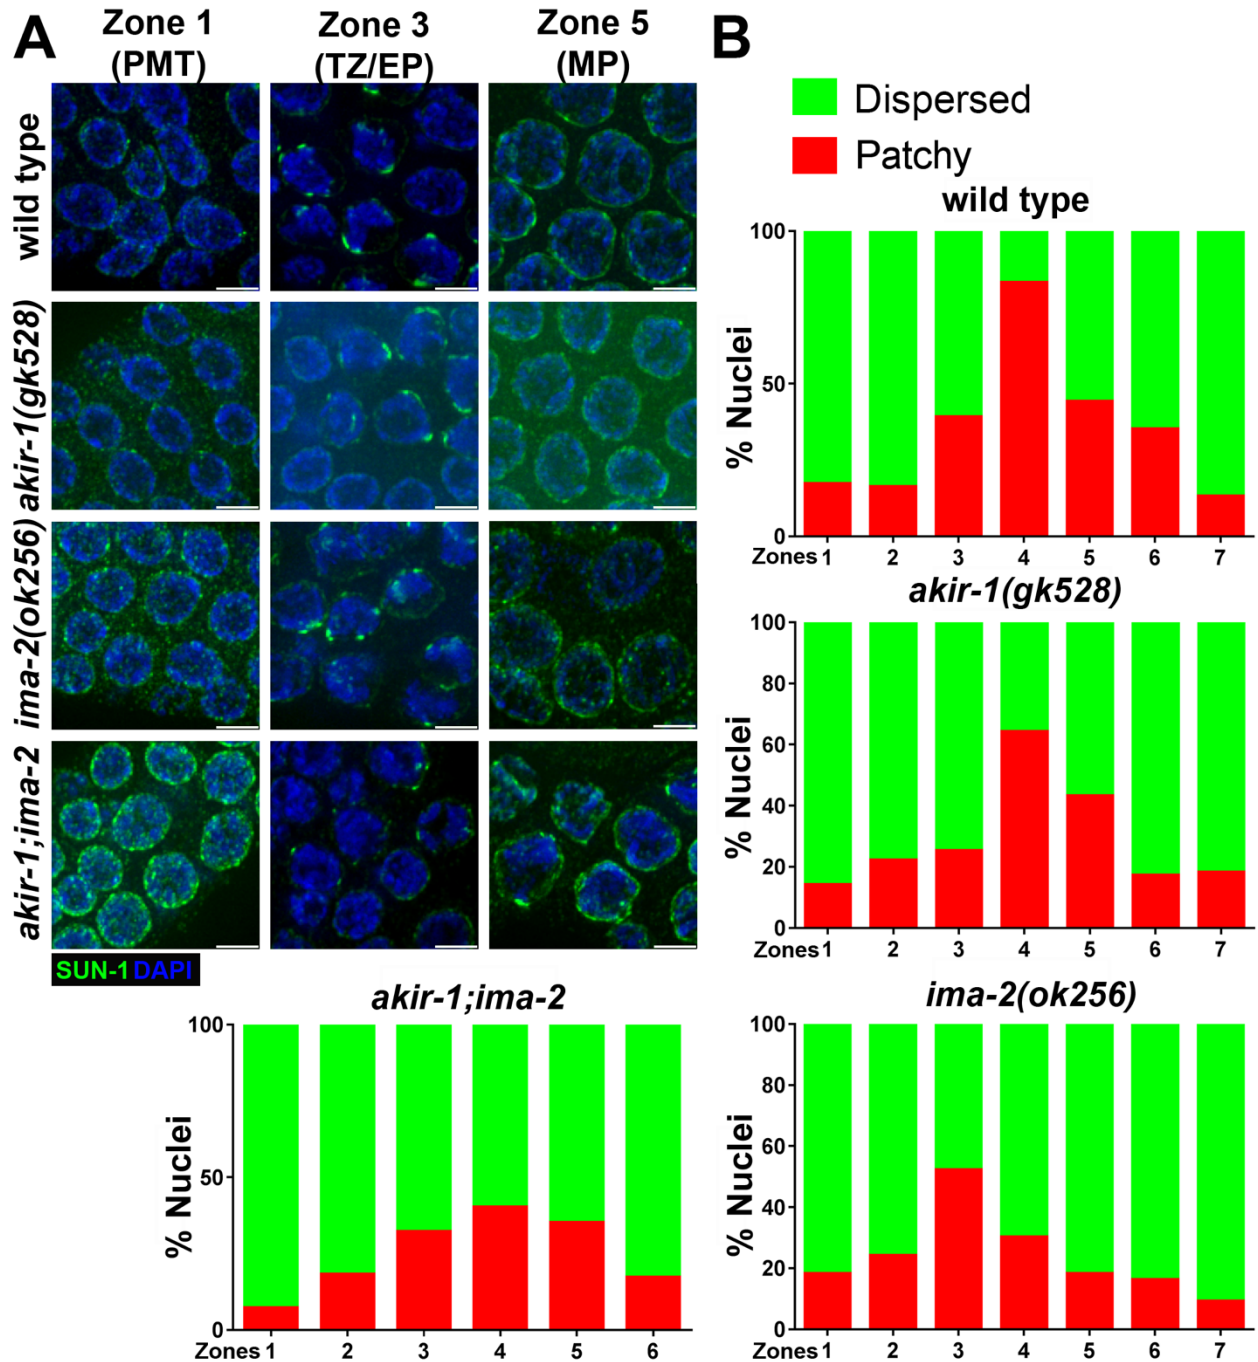

prophase, and dispersed SUN-1 is found in middle prophase. *akir-1(gk528)*, *ima-2(ok256)*, and the double mutant *akir-1(gk528);ima-2(ok256)* SUN-1 follows the same pattern as wild type (n=3 gonads), scale bars are 3 $\mu$ m. B) Quantification of SUN-1 localization as either dispersed (green) or patchy (red). All genotypes display the same phenotypes with some variation in timing of patchy localization. For n values see table S1.

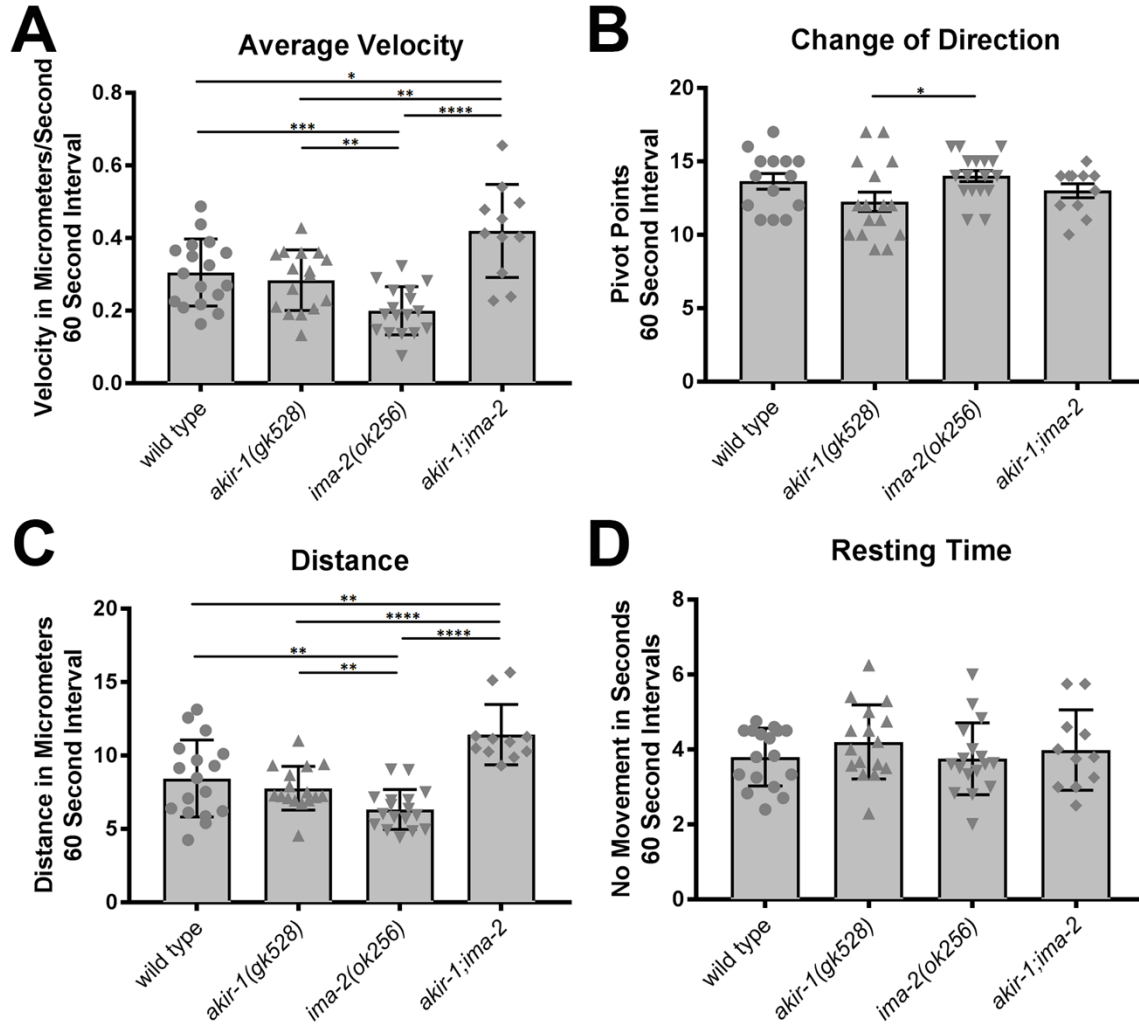

**Figure S5: SUN/KASH complex nuclear envelope movement**

A) Average velocity (distance/interval), number of direction changes, distance travelled, and total periods of no movement during the interval of the SUN/KASH complex. Measured by live imaging GFP tagged ZYG-12 in wild type (n=14), *akir-1(gk528)* (n=16), *ima-2(ok256)* (n=17), and *akir-1;ima-2* (n=11) animals, significance is indicated by asterisks ( $p \leq 0.05$  [ $0.05 \leq * \geq 0.01$ ,  $0.01 < ** \geq 0.001$ ,  $0.001 < *** \geq 0.0001$ ,  $0.0001 < ****$ ] MW u-test).

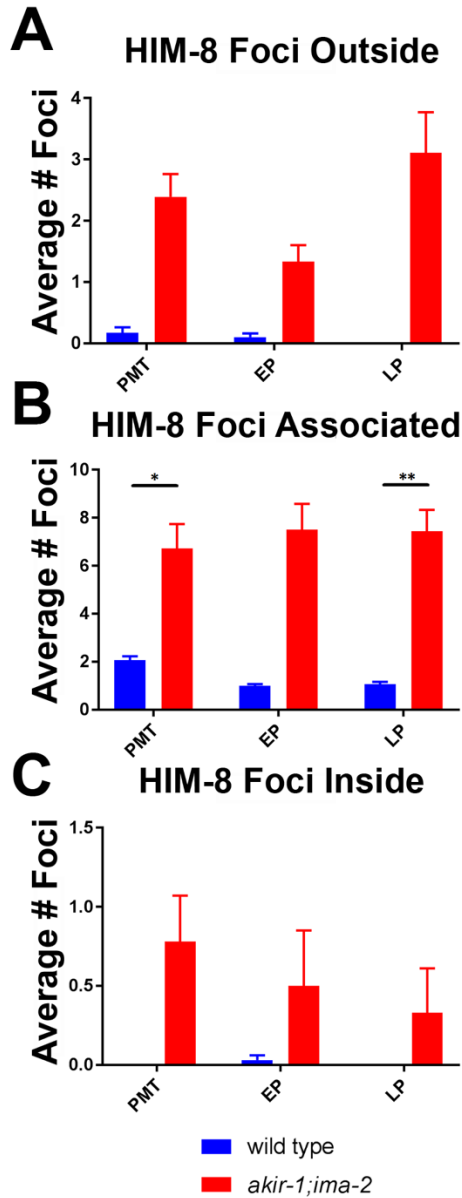

**Figure S6: HIM-8 foci associate with ZYG-12 at the nuclear envelope**

A) Quantification of HIM-8 foci immunolocalization in the cytoplasm of wild type and *akir-1;ima-2* in the germline during mitotic proliferation, early- and late-pachytene. B) Quantification of HIM-8 foci associated with ZYG-12 on the inner nuclear membrane. C) Quantification of HIM-8 foci inside the nucleus, and not associated with ZYG-12, significance indicated by asterisks ( $p \leq 0.05$ ,  $[0.05 \leq * \geq 0.01, 0.01 < ** \geq 0.001]$  MW u-test).

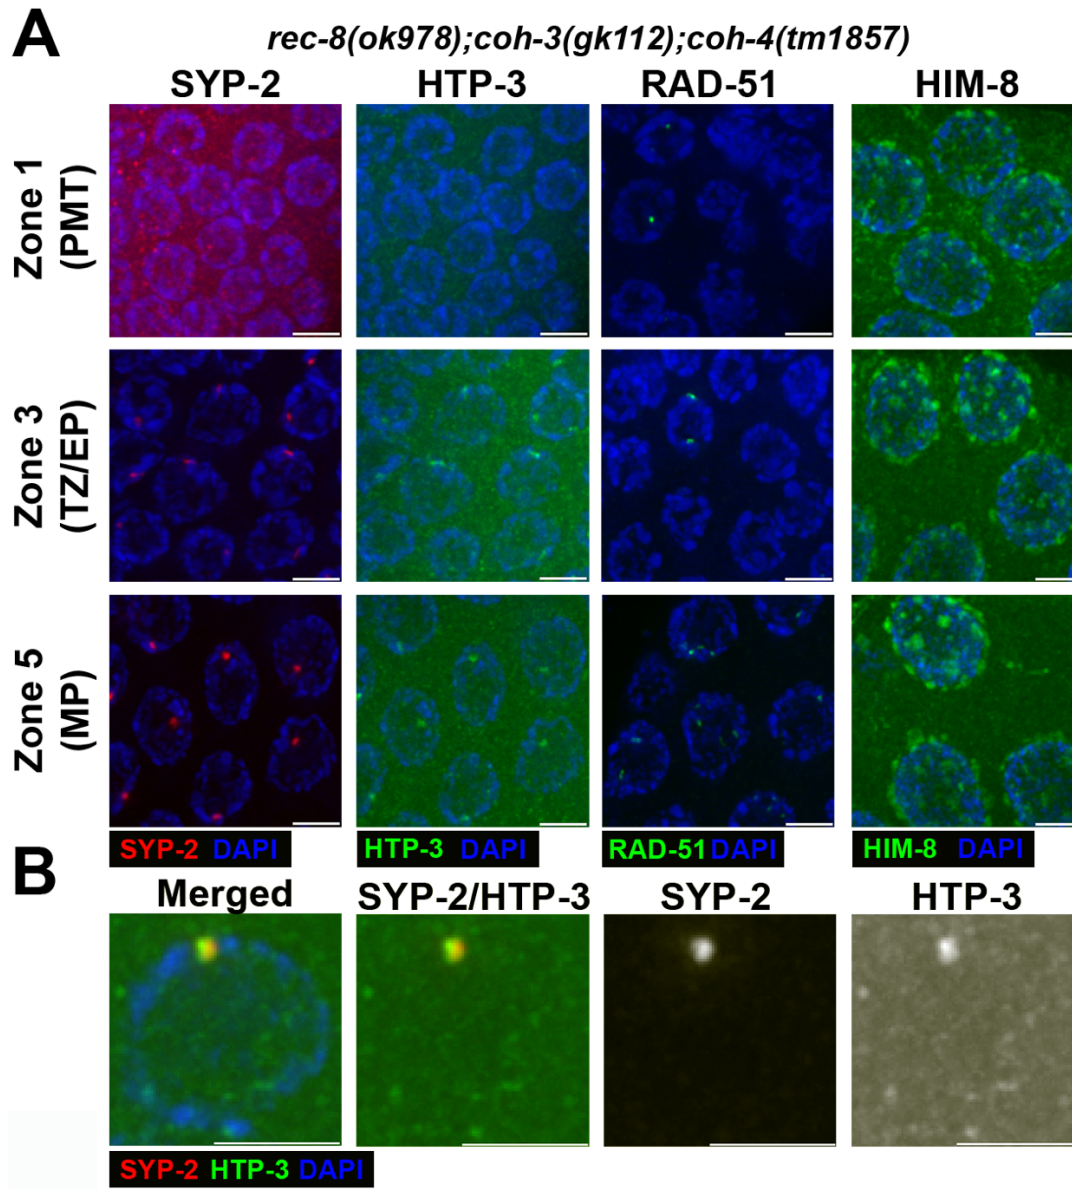

**Figure S7: Loss of REC-8, COH-3, and COH-4 phenocopies *akir-1;ima-2* double mutant HIM-8 localization**

A) Immunolocalization of RAD-51, SYP-1, HTP-3, and HIM-8 in *rec-8;coh-3;coh-4* cohesin deletion triple mutants showing localization patterns for each of the proteins, and indicating similar import and loading defects of the pairing center protein HIM-8, scale bars are 3 $\mu$ m. B) Coimmunostain of SYP-2 and HTP-3 showing co-localization of the central region and axial element proteins in the absence of cohesin complex subunits, scale bars are 3 $\mu$ m.

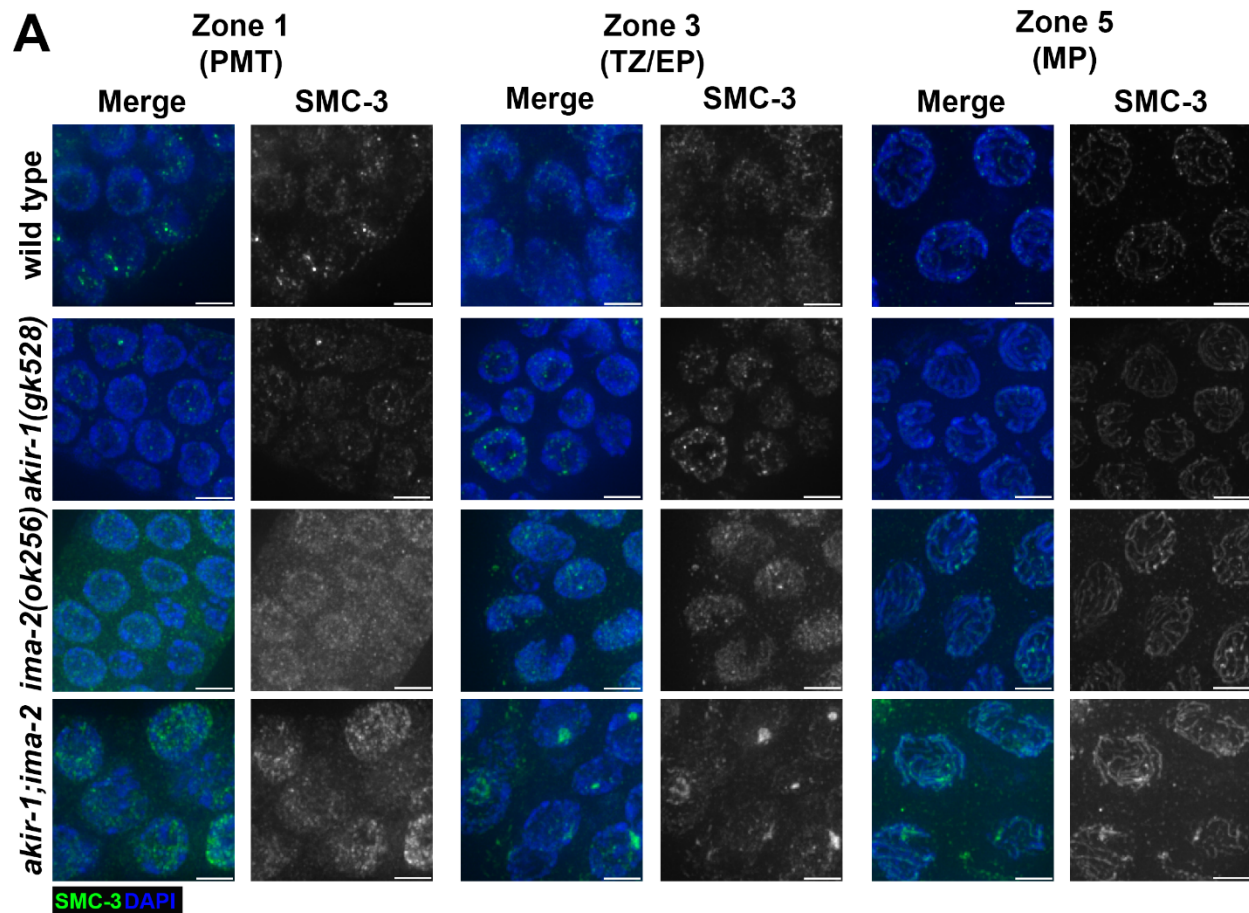

**Figure S8: Loss of AKIR-1 and IMA-2 causes SMC-3 aggregate formation**

A) Immunolocalization of the cohesin subunit SMC-3 for the genotypes indicated. Antibody only channel for each zone is presented on the right of the combined DAPI/antibody channel.

Scale bars are  $3\mu\text{m}$ .



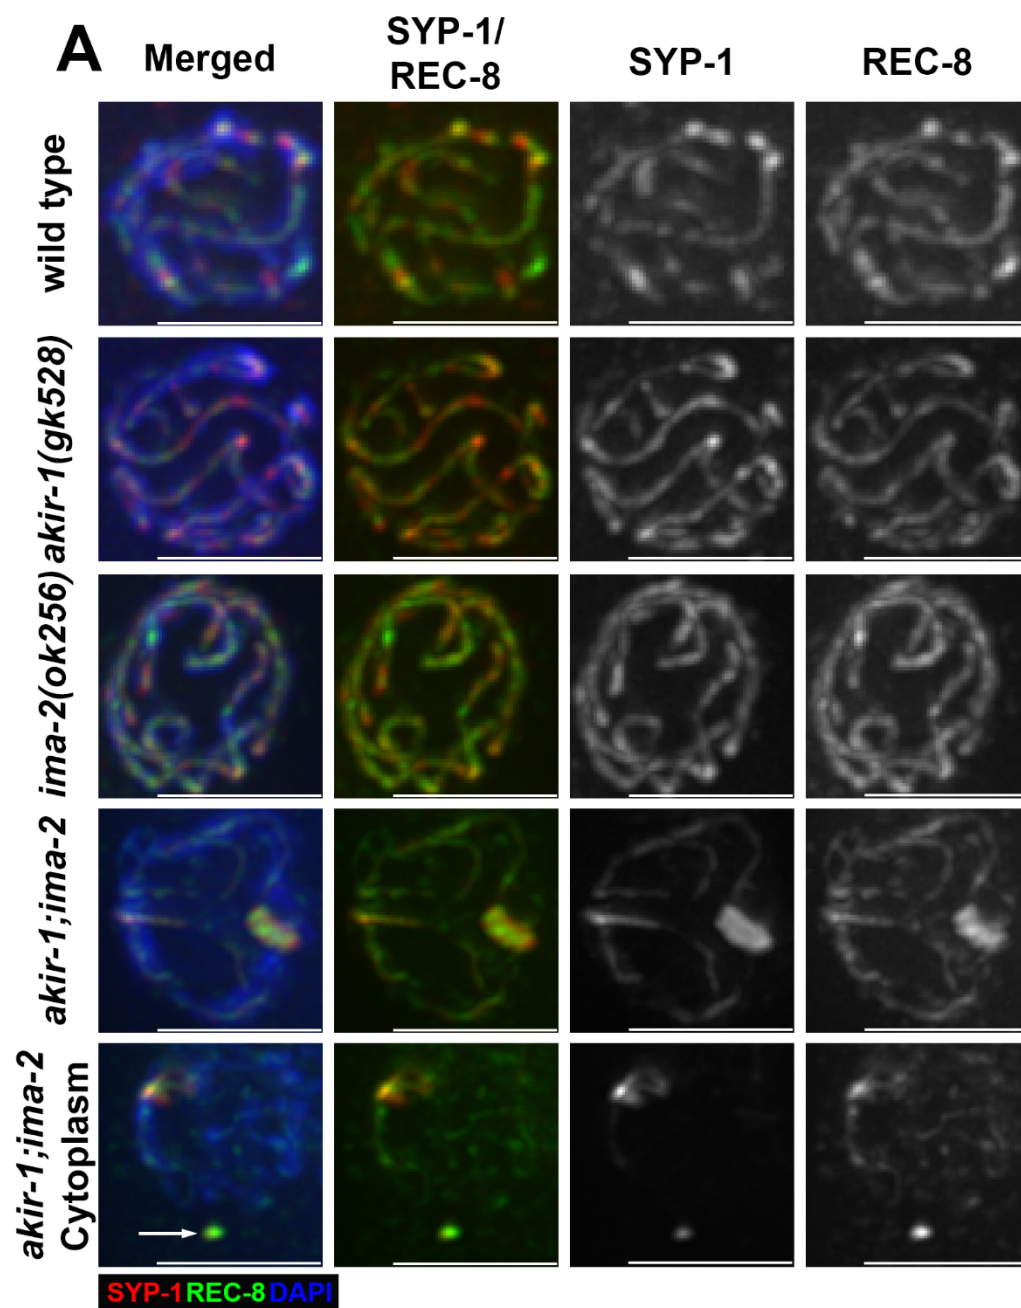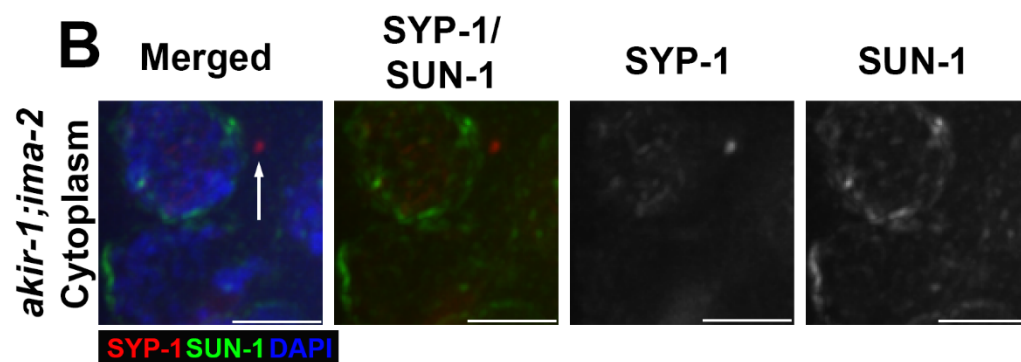

**Figure S9: Co-localization of central region and cohesin complex proteins**

A) Immunolocalization for of the SC central region protein SYP-1 and the cohesion REC-8. Blue is DAPI stained DNA, red is SYP-1, and green is REC-8. The white column under SYP-1 is SYP-1 without DNA in the background, and REC-8 without DNA in the background. The white arrow indicates a cytoplasmic aggregate of REC-8 and SYP-1. B) cytoplasmic aggregates are not enclosed within SUN-1 and thus are cytoplasmic. The white arrow indicates a cytoplasmic aggregate of SYP-1 outside the nuclear envelope as indicated by SUN-1 localization, scale bars are  $3\mu\text{m}$ .

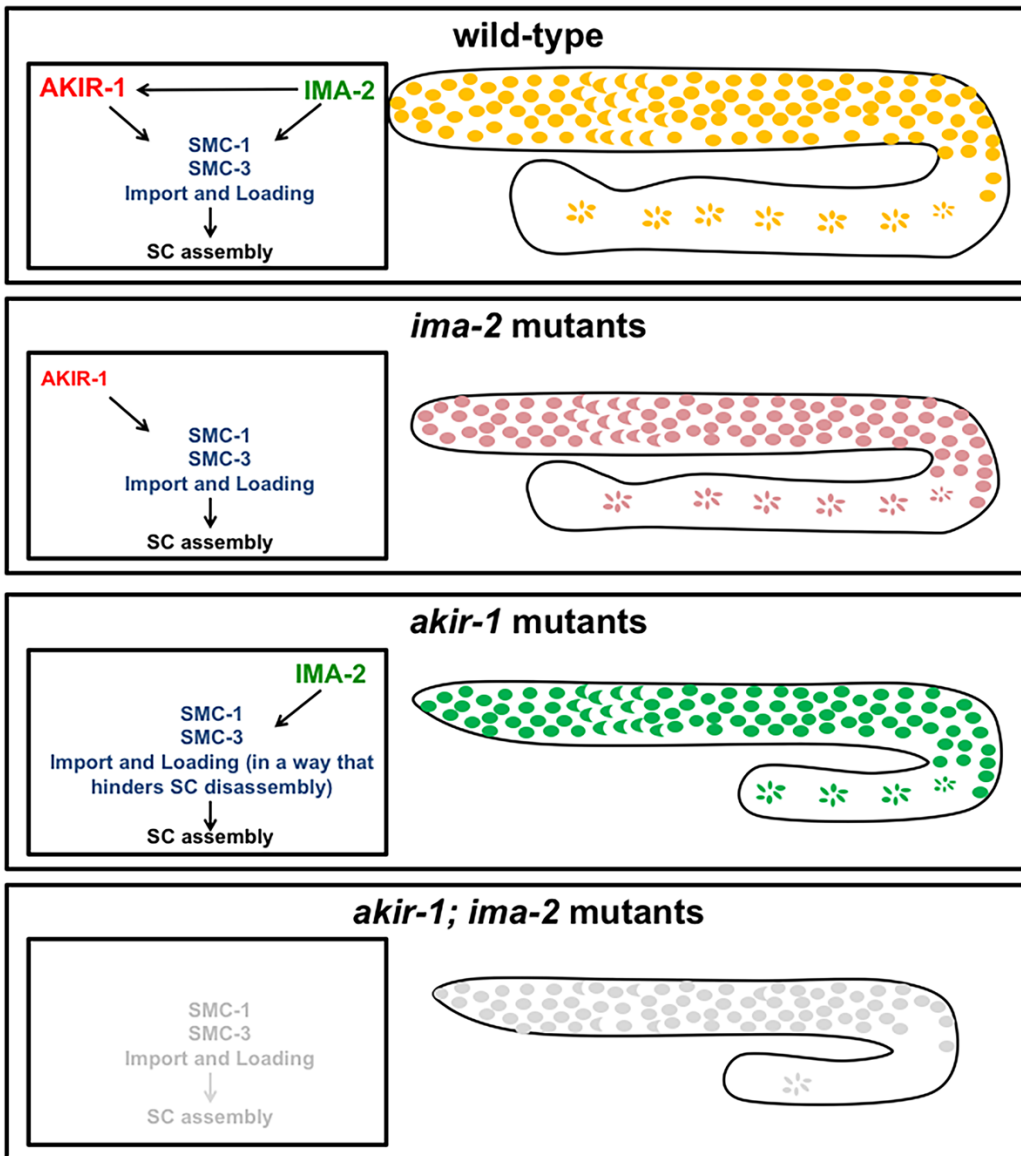

**Figure S10: Model**

Left- a suggested pathway in wild type and in each mutant examined. Right- expression region of AKIR-1 and IMA-2. Green is IMA-2 expression, red is AKIR-1 expression, yellow- both, gray- none. Expression of the IMA-2 and AKIR-1 proteins is found mainly in the nuclei, however, for simplicity the whole germline region is colored. Grey color in the pathway model indicates that the pathway is partially active.
