# Supplementary material
Source: publisher figshare collection journal article supplement (https://gsajournals.figshare.com/articles/dataset/_/7471409)
Supplement: Supplementary file 2 [file 2]

**AKIR-1 and IMA-2 promote nuclear import and assembly of meiotic sister chromatid cohesion proteins in *Caenorhabditis elegans* meiosis**

Richard Bowman, Nathan Balukof, Talitha Ford, and Sarit Smolikove \*

**Supplementary tables**

| Figure             | N2     |        | <i>akir-1(gk528)</i> |        | <i>ima-1(tm7139)</i> |        | <i>akir-1(gk528),<br/>ima-1(tm7139)</i> |        |
|--------------------|--------|--------|----------------------|--------|----------------------|--------|-----------------------------------------|--------|
|                    | gonads | nuclei | gonads               | nuclei | gonads               | nuclei | gonads                                  | nuclei |
| 1A                 | 5      | 1693   | 5                    | 937    | 5                    | 1115   | 5                                       | 545    |
| 1B                 | 5      | 51     | 6                    | 30     | 6                    | 47     | 13                                      | 7      |
| 2B                 | 3      | 712    | 3                    | 486    | 3                    | 455    | 3                                       | 273    |
| 2C                 | 3      | NA     | 3                    | NA     | 3                    | NA     | 3                                       | NA     |
| 3B                 | 3      | 631    | 3                    | 442    | 3                    | 514    | 3                                       | 286    |
| 3C                 | 3      | NA     | 3                    | NA     | 3                    | NA     | 3                                       | NA     |
| 4B                 | 3      | 1237   | 3                    | 470    | 3                    | 606    | 3                                       | 245    |
| 5B (Diakinesis -1) | 20     | NA     | NA                   | NA     | NA                   | NA     | 29                                      | NA     |
| 6B                 | 3      | 826    | 3                    | 647    | 3                    | 535    | 3                                       | 354    |
| 6C                 | 3      | NA     | 3                    | NA     | 3                    | NA     | 3                                       | NA     |
| 7B                 | 3      | 791    | 3                    | 623    | 3                    | 618    | 3                                       | 295    |
| 7C                 | 3      | NA     | 3                    | NA     | 3                    | NA     | 3                                       | NA     |
| 8B                 | 3      | 709    | 3                    | 499    | 3                    | 539    | 3                                       | 259    |
| 8C                 | 3      | NA     | 3                    | NA     | 3                    | NA     | 3                                       | NA     |
| S3B                | 3      | 660    | 3                    | 748    | 3                    | 456    | 3                                       | 359    |
| S3C                | 3      | NA     | 3                    | NA     | 3                    | NA     | 3                                       | NA     |

**Table S1: n values for data presented in Figures.** n values indicate total number of germlines and total number of nuclei analyzed for each genotype for the indicated figures. However, >15 germlines were examined qualitatively for each genotype and staining to ensure that phenotypes are consistent between germlines and the phenotype is not variable.
